# Supplementary material for: Affective bias as a rational response to the statistics of rewards and punishments
Source: eLife. 2017 Oct 4;6:e27879. doi: 10.7554/eLife.27879 (PMC5633345; doi:10.7554/eLife.27879)
Supplement: Figure 2—source data 1. [file elife-27879-fig2-data1.xlsx]

## Sheet: erdem_parameters_all
subnum	winlrboth	losslrboth	winlrlossinf	losslrlossinf	winlrwininf	losslrwininf	blockorder	betawinboth	betalossboth	betawinlossinf	betalosslossinf	betawinwininf	betalosswininf		trait anx	qids		winpupileffect	losspupileffect
1	-0.0291678	0.554076	-1.22746	-0.271937	-0.0655598	-2.79154	2	2.01014	1.99727	1.18769	0.781931	1.79752	1.88502		24	1		0.0640521	0.571457
2	1.10108	1.33449	-1.14628	-0.790899	-0.417346	-2.55978	1	1.60032	1.46661	3.72422	3.72193	2.48759	2.63227		33	4		0.328395	0.448078
3	0.429951	-0.297716	-1.09285	0.140968	-0.590699	-2.67788	2	2.16576	2.17612	2.7081	2.50248	3.16912	3.39856		33	2		-0.297329	0.527879
4	1.47813	0.00360045	1.09096	-1.49629	1.00495	-0.637937	1	-0.17046	-0.679831	-0.893997	-0.840144	0.734962	1.05394		28	0		0.0685924	0.353102
5	-0.245587	-1.00414	-0.614968	-0.0391056	-0.165312	-0.374682	2	2.37363	2.36662	3.68568	3.45976	4.10416	4.10505		26	1		0.0604144	-0.218074
6	-4.41016	-1.37437	-2.59615	-1.53214	-1.44578	-3.59188	1	3.28322	3.28523	4.24598	4.0094	3.19042	3.1778		39	3		-0.151562	0.140497
7	0.584977	0.971814	-1.18626	1.73309	-1.1358	0.504867	2	1.55948	1.45215	1.08493	0.521982	0.972666	0.0498794		24	2		0.0674519	-0.104416
8	-4.15636	-2.3643	-2.59127	-1.04065	-1.44788	-3.15579	1	3.76169	3.99989	3.22289	3.06227	2.92409	3.16211		41	9		-0.254422	0.257995
9	0.430699	0.479867	0.590412	-0.170743	1.81209	-1.38219	1	1.73942	1.28523	0.923434	1.22744	1.32133	1.42674		52	11		-0.421204	0.327529
10	0.564693	-0.902016	-0.641605	0.976934	-0.772527	-1.46879	2	1.65589	2.23084	1.40365	1.17207	2.23117	2.23125		21	0		0.767308	0.934396
11	-0.462059	-0.266742	-2.49448	-1.0563	-0.678105	-1.40721	1	4.24158	4.00319	4.03054	3.82003	2.46537	2.48361		45	7		0.0321305	0.22114
12	-2.08007	-0.296321	-0.772301	-1.58017	-0.457981	-1.20457	1	-0.23202	-1.50893	-1.20126	-0.0244709	0.152151	-0.194458		45	10		-0.168707	0.147494
13	0.783842	0.654284	-1.93331	0.579416	2.35976	-2.27855	1	3.91775	3.91773	-1.14358	-1.21546	2.20562	2.13612		22	5		0.0968673	0.00943947
14	-1.20579	-0.598034	-0.529814	-3.16897	-0.692691	-0.324968	2	-0.132122	-1.49038	-1.20309	0.311339	-1.25609	-1.50446		46	11		0.0768154	-0.0873169
15	1.6111	0.951146	-0.759083	-0.615794	-1.18831	-1.72721	2	2.84439	2.85626	3.14633	3.08152	4.03707	4.04867		48	13		0.263574	0.091085
16	-1.01867	-0.254859	-0.639423	0.475343	-0.406238	-0.0870717	1	-0.21746	-0.469501	-1.10732	-0.69899	-1.29759	0.119924		42	10		0.37953	-0.157205
17	0.523022	-0.563984	-2.38268	-1.35883	-1.2891	-1.92175	1	1.50712	1.32006	3.78918	3.78709	2.73382	2.49821		31	5		-0.0269086	0.48847
18	0.392075	-1.59715	-2.06724	-1.19424	-0.363338	-3.6492	1	2.13742	2.0902	3.0389	2.81663	2.45258	2.47205		28	5		0.242572	0.189796
19	-1.60608	-0.948807	-2.29458	-1.15293	1.17062	-0.695151	2	1.3152	1.32105	-1.26601	-1.51826	1.24881	0.589205		45	6		0.62158	0.366201
20	-2.49297	-0.785963	-3.87729	-1.32607	-0.764223	-2.18681	2	2.09068	2.1272	2.96887	2.95634	2.27746	2.15516		47	7		-0.18057	-0.147069
21	1.63675	-0.341037	0.555332	-0.187864	0.27462	-0.636727	1	1.39701	1.38586	1.49794	1.54394	2.3508	2.46247		47	7		0.222375	-0.260635
22	0.422353	-0.032489	0.151703	0.216136	-0.508131	-1.3384	2	2.95517	2.95715	4.13614	4.13552	2.35941	2.55413		59	20
23	-2.54051	1.64133	0.59889	2.39929	-1.02811	1.95072	2	1.46084	1.36152	0.519662	0.815384	0.887694	0.840724		34	3		0.440238	-0.111694
24	-1.67359	-1.38849	-2.47284	-2.10875	-0.561824	-2.16648	2	2.03587	2.03719	3.19976	3.19981	2.53425	2.50896		23	2		-0.285167	-0.0166698
25	-0.0697569	0.873402	-1.70834	-2.14022	-1.67632	-1.71618	2	1.64791	1.3221	2.43832	2.67027	2.39176	2.16252		61	11		-0.517858	-0.370351
26	-3.36884	-1.51738	-2.75026	-2.61406	-1.53214	-2.59615	2	3.25552	2.91996	3.41727	3.41726	4.0094	4.24598		24	1		0.0270683	0.389945
27	-3.99502	-1.52477	-2.205	-2.21793	-1.50829	-2.60785	2	3.6907	3.66437	3.75899	3.7591	2.76196	2.90536		41	4		-0.123187	-0.0271415
28	-0.0899039	-0.0318328	-2.29515	-1.18068	-0.753873	-3.66487	1	2.72729	2.69911	3.90608	3.67296	2.54984	2.56192		32	0		-0.180047	0.483116
29	-0.647169	-3.54005	-0.961063	-0.673526	-0.630486	-2.89051	1	1.87447	1.88388	3.04379	3.04654	2.58654	2.6596		25	6		-0.332688	0.506513
30	-0.617768	-2.28495	-3.08332	-1.08967	-0.700873	-3.26756	1	1.98525	2.03744	3.35595	3.12536	2.28091	2.25525		31	0		0.161701	0.49744
	Note column headers first give parameter estimated (e.g. winlr, betaloss) and then the task block (both, wininf, lossinf)
	block order 1=loss informative first, 2=win informative first
	All learning rates have been transformed using inverse logit, all betas are log transformed (analyses were run on transformed data)
	trait and qids are questionnaire scores
	winpupileffect and loss pupileffect are the data used to calculate figure 4
